# Supplementary material for: Rare Copy Number Variants Contribute to Congenital Left-Sided Heart Disease
Source: PLoS Genet. 2012 Sep 6;8(9):e1002903. doi: 10.1371/journal.pgen.1002903 (PMC3435243; doi:10.1371/journal.pgen.1002903)
Supplement: Table S4 — CNV Regions enriched after adjusting for family structure and comparison with OHI cohort. The first and the second component of the PCA were used in the regression analysis to adjust for family structure in the identification of enriched CNV regions. (XLSX) [file pgen.1002903.s009.xlsx]

## Sheet: Sheet1
PROC LOGISTIC
Q1														50% of the region covered by segemental duplications	CNVs present with 50% overlap and a population frequency of 0.01%	Refseq Genename
Chr	Start	End	POOL	N	Global	Estimate	StdErr	p-value	effect	OR	Lower	Upper	R2
					p-value
10	46570464	46570464	S379	991	0.000231083	0.924817	0.296972	0.00184472	Duplication vs Normal	6.35749	1.98481	20.3635	0.0193394	Yes	Yes	ANXA8
10	47030119	47165275	S364	993	0.0022084	0.819013	0.298055	0.00599867	Duplication vs Normal	5.145	1.59947	16.5499	0.01458	Yes	Yes	ANTXRL
17	18302411	18394162	S18	607	4.38816e-05	0.50875	0.121993	3.04187e-05	Duplication vs Normal	2.76627	1.7148	4.46249	0.0369077	Yes	Yes	LGALS9C, LOC220594, FAM106A, CCDC144B
Q2
Chr	Start	End	POOL	N	Global	Estimate	StdErr	p-value	effect	OR	Lower	Upper	R2
					p-value
17	18302411	18394162	S18	809	1.23108e-17	0.945356	0.120192	3.68012e-15	Deletion vs Normal	6.62408	4.13533	10.6106	0.0962238	Yes	Yes	LGALS9C, LOC220594, FAM106A, CCDC144B
Q3
Chr	Start	End	POOL	N	Global	Estimate	StdErr	p-value	effect	OR	Lower	Upper	R2
					p-value
10	46570464	46570464	S379	997	9.64586e-05	0.960428	0.296621	0.00120416	Dup/Del vs Normal	6.82679	2.13426	21.8366	0.0210225	Yes	Yes	ANXA8
10	47030119	47165275	S364	997	0.00542061	0.694986	0.260496	0.00763185	Dup/Del vs Normal	4.01474	1.44607	11.1462	0.0126225	Yes	Yes	ANTXRL
17	18302411	18394162	S18	997	6.08149e-17	0.769514	0.0931644	1.45983e-16	Dup/Del vs Normal	4.66006	3.23436	6.71421	0.0758232	Yes	Yes	LGALS9C, LOC220594, FAM106A, CCDC144B
